# Supplementary material
Source: publisher figshare collection journal article supplement (https://rs.figshare.com/ndownloader/files/21214737)

# Supporting Information Figure S1

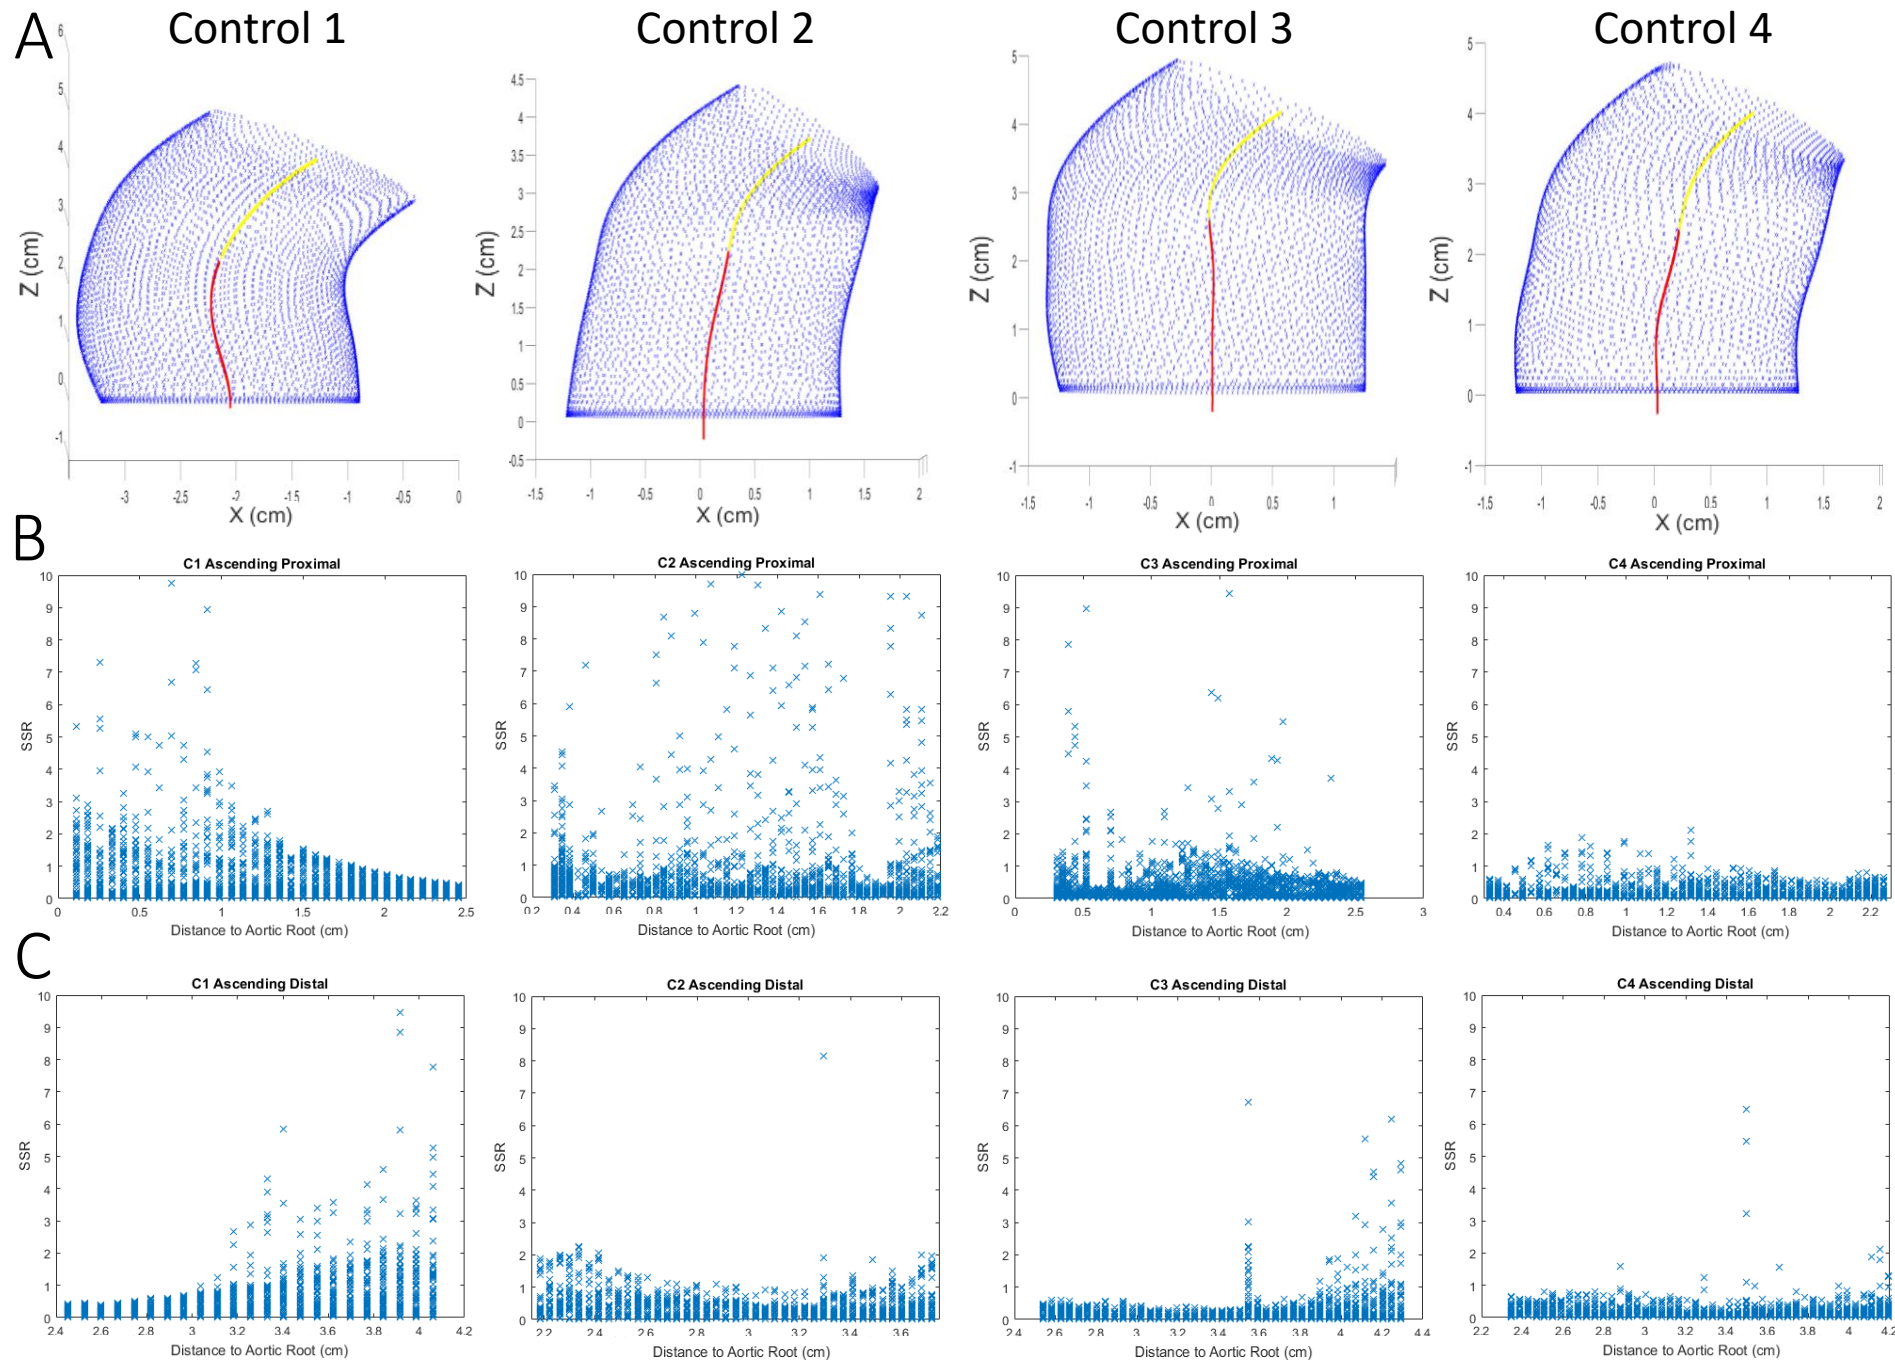

# Supporting Information Figure S2

**A****Stable 1****Stable 2****Stable 3****Stable 4**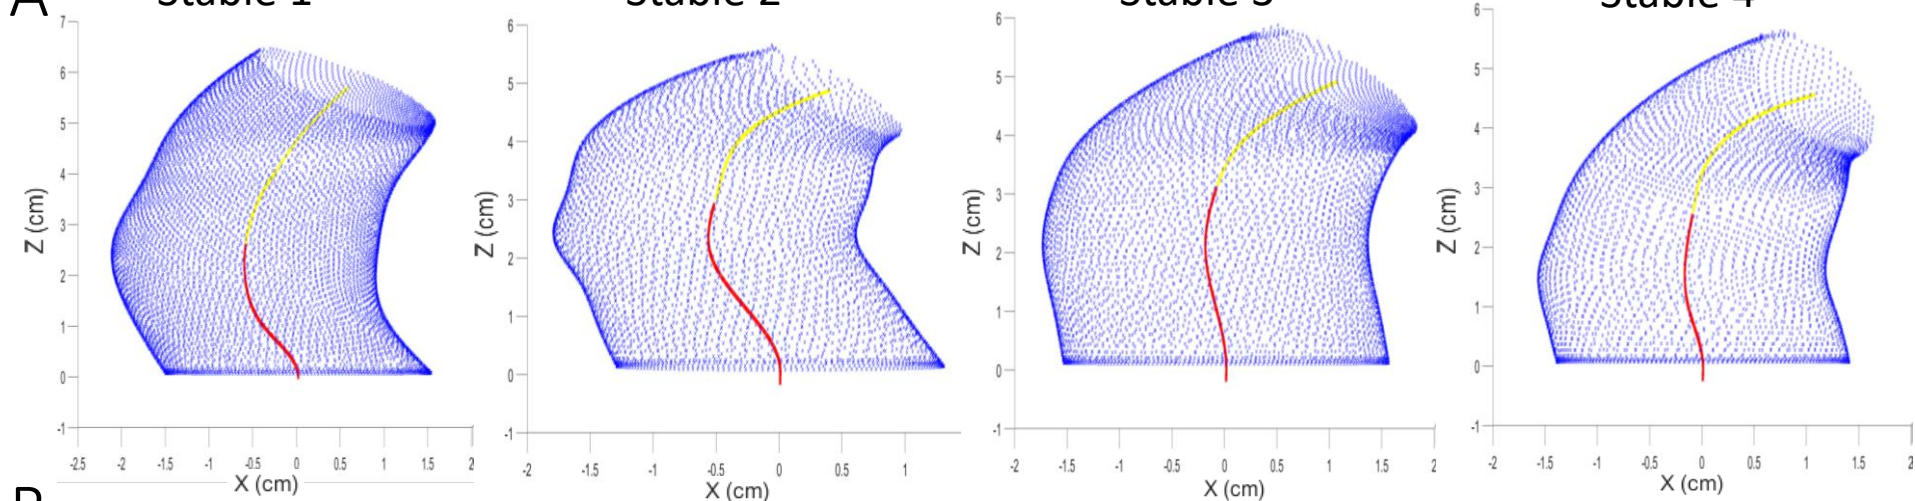**B**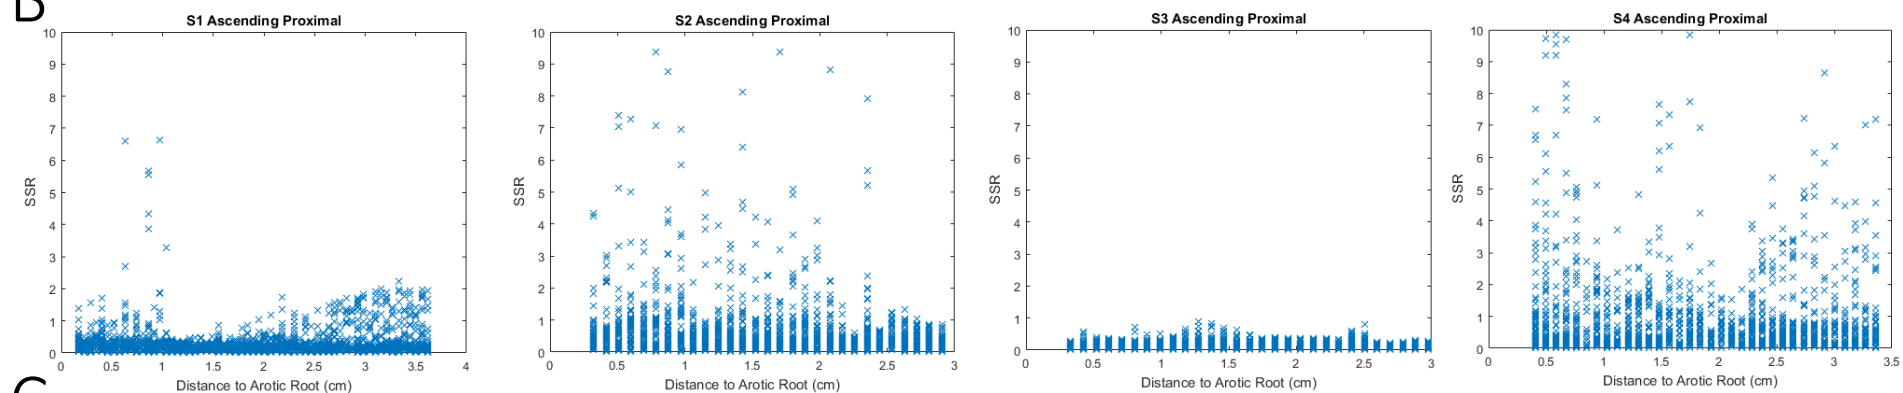**C**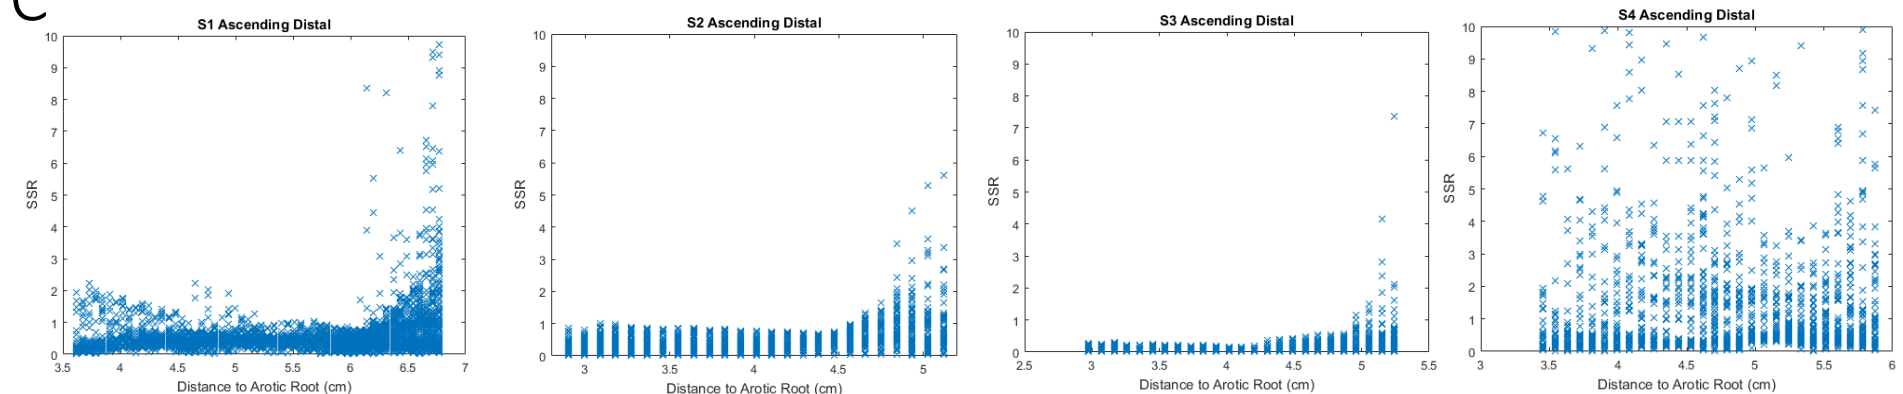



# Supporting Information Figure S3

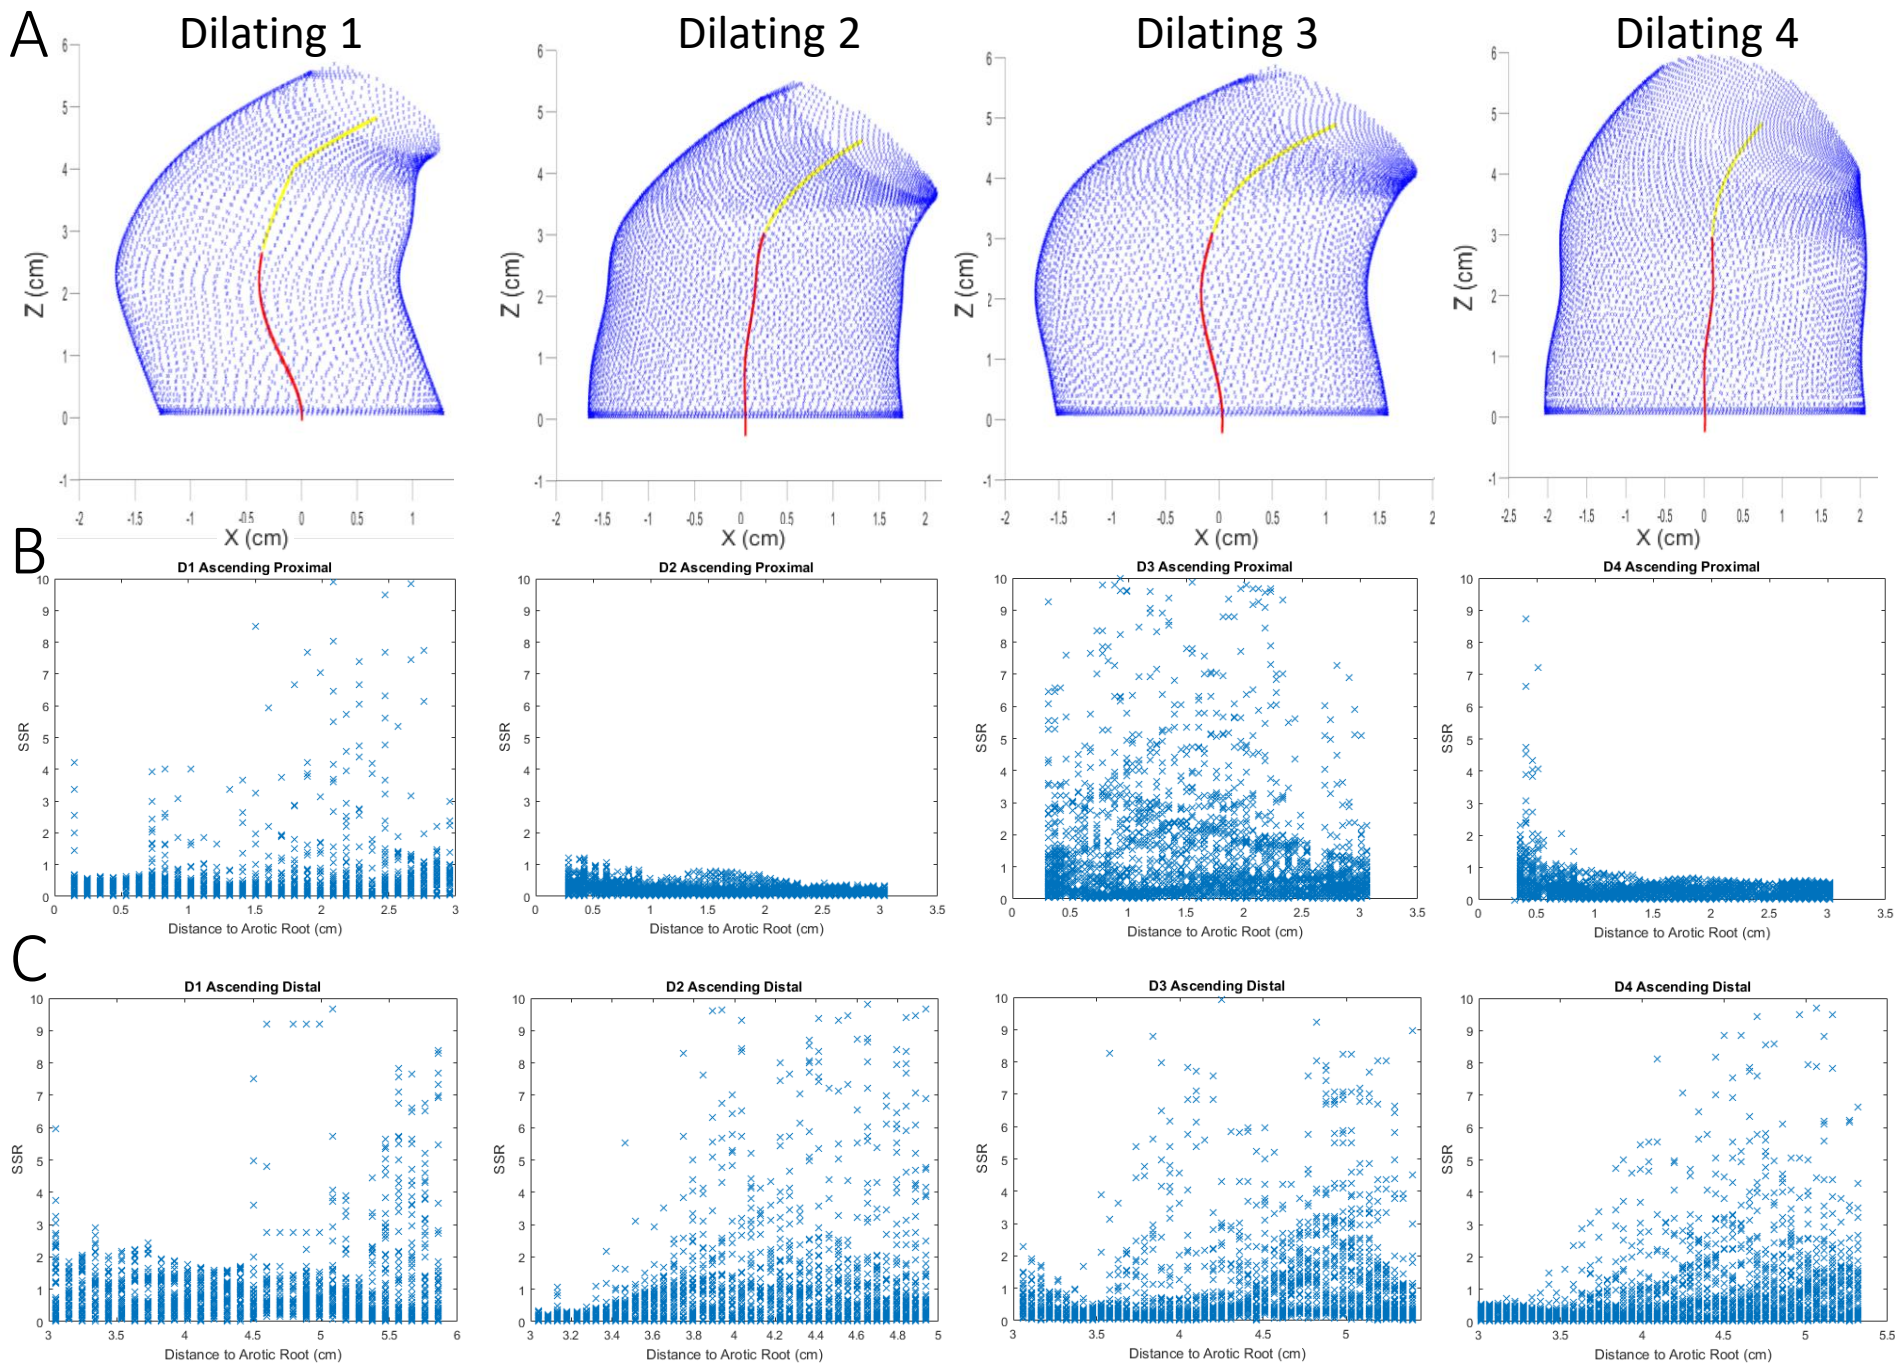

Supplement: Supplementary file [file 21214737]
